# Supplementary material
Source: publisher figshare collection journal article supplement (https://frontiersin.figshare.com/ndownloader/files/16251944)
Supplement: Supplementary file 1 [file 16251944]

**Supplementary Table 1**. Parameters of the R/V *Helmer Hanssen*'s keel-mounted EK60 in 2016 and 2017.

| Parameters | 18 kHz | 38 kHz |
| --- | --- | --- |
| Sa Correction (dB) | -0.69 | -0.63 |
| Transducer gain (dB) | 23.13 | 26.77 |
| Major axis 3dB beam angle (°) | 11.00 | 7.03 |
| Major axis angle offset (°) | -0.15 | -0.11 |
| Major axis angle sensitivity | 13.90 | 21.9 |
| Minor axis 3dB beam angle (°) | 10.91 | 7.08 |
| Minor axis angle offset (°) | -0.15 | -0.09 |
| Minor axis angle sensitivity | 13.90 | 21.90 |
| Power (Watts) | 2000 | 2000 |
| Pulse length (milliseconds) | 1.024 | 1.024 |
| Two-way beam angle (dB re 1 steradian) | -17.00 | -20.80 |
